# Supplementary material for: Using whole-genome sequences of the LG/J and SM/J inbred mouse strains to prioritize quantitative trait genes and nucleotides
Source: PubMed Central journal article supplement (PMC4445795; doi:10.1186/s12864-015-1592-3), 2015-05-28
Supplement: 12864_2015_1592_MOESM1_ESM.pdf [file 12864_2015_1592_MOESM1_ESM.pdf]

**Additional File 1. LG/J, SM/J and LG/J x SM/J Polymorphic SNPs Overview**

| Chr | total  | 2.5kb<br>downstream | 2.5kb<br>upstream | 3prime<br>UTR | 5prime<br>UTR | Intron | Regulatory<br>Features | Synonymous | Non-<br>Synonymous | Stop | Splice | Strain* |
|-----|--------|---------------------|-------------------|---------------|---------------|--------|------------------------|------------|--------------------|------|--------|---------|
| 1   | 430411 | 18687               | 16369             | 5288          | 2341          | 157434 | 16752                  | 2829       | 1321               | 2    | 0      | LG/J    |
|     | 425372 | 18768               | 17414             | 5568          | 2251          | 154505 | 17621                  | 3103       | 1458               | 2    | 0      | SM/J    |
|     | 439912 | 16930               | 18990             | 4861          | 1966          | 151340 | 15910                  | 2438       | 1254               | 2    | 0      | P       |
| 2   | 241268 | 15301               | 12729             | 3751          | 2107          | 96344  | 10082                  | 2081       | 975                | 0    | 1      | LG/J    |
|     | 351593 | 25530               | 21520             | 5766          | 3846          | 148851 | 14934                  | 3642       | 1929               | 5    | 1      | SM/J    |
|     | 324056 | 25899               | 21552             | 5983          | 3971          | 150368 | 13681                  | 3529       | 1806               | 5    | 2      | P       |
| 3   | 257379 | 9487                | 7716              | 2445          | 1290          | 66540  | 7698                   | 1293       | 686                | 3    | 1      | LG/J    |
|     | 326406 | 13015               | 10908             | 3161          | 1742          | 91204  | 11400                  | 2179       | 1076               | 6    | 1      | SM/J    |
|     | 291799 | 10995               | 9253              | 2974          | 1452          | 90510  | 9452                   | 1814       | 926                | 7    | 0      | P       |
| 4   | 319898 | 26925               | 25289             | 6591          | 3784          | 146387 | 23622                  | 1943       | 3844               | 11   | 1      | LG/J    |
|     | 340286 | 27243               | 26054             | 6713          | 4024          | 149744 | 24518                  | 3905       | 1916               | 9    | 2      | SM/J    |
|     | 303559 | 23729               | 21798             | 5532          | 3448          | 139317 | 17449                  | 2748       | 1458               | 6    | 1      | P       |
| 5   | 222406 | 12179               | 11414             | 3011          | 1919          | 82164  | 13374                  | 2045       | 843                | 3    | 0      | LG/J    |
|     | 217450 | 10483               | 8961              | 2651          | 1498          | 82436  | 10582                  | 1739       | 801                | 7    | 0      | SM/J    |
|     | 178882 | 11146               | 9647              | 2910          | 1646          | 73929  | 11098                  | 1708       | 731                | 8    | 0      | P       |
| 6   | 254980 | 12189               | 11776             | 3230          | 1215          | 94444  | 7075                   | 1771       | 1072               | 3    | 0      | LG/J    |
|     | 241821 | 11302               | 11213             | 2996          | 1610          | 100359 | 9773                   | 1768       | 1033               | 8    | 0      | SM/J    |
|     | 341520 | 17152               | 16807             | 4190          | 2066          | 137252 | 13377                  | 2209       | 1313               | 7    | 0      | P       |
| 7   | 220182 | 14274               | 13760             | 3275          | 1669          | 67898  | 10553                  | 2285       | 1393               | 9    | 0      | LG/J    |
|     | 340882 | 24159               | 22923             | 5125          | 2897          | 123357 | 16221                  | 3897       | 2194               | 10   | 0      | SM/J    |
|     | 349017 | 27675               | 26484             | 5642          | 3055          | 127513 | 16368                  | 3978       | 2490               | 18   | 0      | P       |
| 8   | 324513 | 14733               | 14011             | 3691          | 2237          | 105646 | 17088                  | 2577       | 1243               | 4    | 1      | LG/J    |
|     | 321785 | 15028               | 13942             | 3849          | 2161          | 104952 | 16593                  | 2494       | 1137               | 4    | 1      | SM/J    |
|     | 174707 | 9309                | 9407              | 2283          | 804           | 78691  | 11120                  | 1672       | 723                | 0    | 2      | P       |
| 9   | 297724 | 14387               | 12644             | 3405          | 1858          | 115556 | 14415                  | 2452       | 1036               | 2    | 0      | LG/J    |
|     | 223192 | 12052               | 10680             | 2976          | 1471          | 97299  | 12377                  | 2160       | 883                | 2    | 0      | SM/J    |
|     | 280513 | 13520               | 11959             | 3343          | 1630          | 113360 | 12638                  | 1974       | 885                | 4    | 0      | P       |
| 10  | 217079 | 8784                | 7958              | 2392          | 1243          | 74342  | 9632                   | 1532       | 653                | 7    | 0      | LG/J    |
|     | 193494 | 10331               | 8773              | 2896          | 1068          | 71508  | 11269                  | 1737       | 702                | 2    | 1      | SM/J    |
|     | 270167 | 12593               | 11075             | 3319          | 1654          | 90831  | 14126                  | 2113       | 845                | 7    | 1      | P       |
| 11  | 258660 | 22100               | 20020             | 5513          | 2879          | 112860 | 18341                  | 4219       | 1640               | 11   | 1      | LG/J    |
|     | 215773 | 18146               | 17015             | 4621          | 2392          | 87800  | 15667                  | 3816       | 1210               | 7    | 5      | SM/J    |

|        |         |        |        |       |       |         |        |       |       |     |    |      |
|--------|---------|--------|--------|-------|-------|---------|--------|-------|-------|-----|----|------|
|        | 225672  | 22567  | 20331  | 5632  | 2988  | 99708   | 17124  | 4251  | 1595  | 14  | 4  | P    |
| 12     | 282264  | 11880  | 10767  | 1951  | 828   | 70352   | 10993  | 1372  | 538   | 7   | 1  | LG/J |
|        | 285957  | 12049  | 10951  | 1686  | 761   | 66383   | 10579  | 1206  | 523   | 2   | 0  | SM/J |
|        | 279780  | 13333  | 12669  | 1509  | 860   | 64411   | 9605   | 1013  | 513   | 7   | 1  | P    |
|        | 306024  | 9916   | 8555   | 2548  | 1152  | 93365   | 11506  | 1494  | 841   | 5   | 0  | LG/J |
| 13     | 224841  | 9436   | 8392   | 2515  | 1140  | 79873   | 10698  | 1355  | 701   | 5   | 0  | SM/J |
|        | 266487  | 9958   | 8998   | 2846  | 1255  | 76874   | 11100  | 1347  | 624   | 2   | 0  | P    |
|        | 177008  | 8951   | 8631   | 1572  | 961   | 54225   | 7075   | 1301  | 583   | 2   | 0  | LG/J |
| 14     | 301057  | 10926  | 10281  | 1889  | 1298  | 74235   | 9457   | 1544  | 781   | 3   | 0  | SM/J |
|        | 191230  | 6437   | 6315   | 1011  | 667   | 38234   | 5069   | 547   | 329   | 1   | 0  | P    |
|        | 150048  | 5187   | 4379   | 1362  | 640   | 43364   | 6589   | 718   | 449   | 1   | 0  | LG/J |
| 15     | 148361  | 5743   | 4445   | 1685  | 668   | 47242   | 7252   | 949   | 562   | 0   | 0  | SM/J |
|        | 192313  | 6797   | 5660   | 1807  | 760   | 61819   | 8116   | 1043  | 446   | 1   | 0  | P    |
|        | 127831  | 4433   | 3793   | 1103  | 696   | 34994   | 3743   | 660   | 372   | 0   | 2  | LG/J |
| 16     | 157397  | 6950   | 6510   | 1769  | 981   | 52037   | 6049   | 1166  | 741   | 2   | 2  | SM/J |
|        | 140733  | 7062   | 6054   | 1903  | 1001  | 53085   | 5365   | 1124  | 700   | 2   | 0  | P    |
|        | 188558  | 14875  | 14197  | 4096  | 2024  | 71072   | 12410  | 2583  | 1359  | 7   | 0  | LG/J |
| 17     | 166875  | 11390  | 10625  | 2957  | 1797  | 64746   | 10607  | 2051  | 955   | 3   | 0  | SM/J |
|        | 191038  | 14841  | 14259  | 3923  | 2297  | 73497   | 12337  | 2441  | 1353  | 10  | 0  | P    |
|        | 118520  | 3146   | 2950   | 1023  | 490   | 41015   | 4613   | 512   | 193   | 0   | 0  | LG/J |
| 18     | 145502  | 4750   | 4446   | 1471  | 646   | 50568   | 6325   | 808   | 334   | 0   | 0  | SM/J |
|        | 160686  | 5151   | 4909   | 1630  | 579   | 58722   | 6892   | 787   | 317   | 0   | 0  | P    |
|        | 138869  | 5806   | 5201   | 1842  | 720   | 63567   | 7400   | 1144  | 403   | 1   | 0  | LG/J |
| 19     | 112000  | 4460   | 4137   | 1496  | 536   | 50471   | 6054   | 1029  | 435   | 2   | 0  | SM/J |
|        | 116478  | 3916   | 3542   | 1122  | 409   | 50291   | 5178   | 817   | 272   | 0   | 0  | P    |
|        | 130101  | 4502   | 4410   | 991   | 738   | 20302   | 1590   | 241   | 247   | 3   | 0  | LG/J |
| X      | 52524   | 2849   | 2688   | 716   | 425   | 14417   | 1221   | 224   | 178   | 2   | 0  | SM/J |
|        | 129008  | 4545   | 4412   | 989   | 682   | 21830   | 1710   | 289   | 217   | 1   | 0  | P    |
| genome | 4663723 | 237742 | 216569 | 59080 | 30791 | 1611871 | 217714 | 35052 | 19691 | 81  | 8  | LG/J |
|        | 4792568 | 254610 | 231878 | 62506 | 33212 | 1711987 | 229197 | 40772 | 19549 | 81  | 13 | SM/J |
|        | 4847557 | 263555 | 227030 | 63409 | 33190 | 1751582 | 217715 | 37842 | 18797 | 102 | 11 | P    |

\* LG/J = SNPs in LG/J relative to reference genome; SM/J = SNPs in SM/J relative to reference genome; P = SNPs that are polymorphic between the LG/J and SM/J strains.
