# Supplementary material for: Using whole-genome sequences of the LG/J and SM/J inbred mouse strains to prioritize quantitative trait genes and nucleotides
Source: PubMed Central journal article supplement (PMC4445795; doi:10.1186/s12864-015-1592-3), 2015-05-28
Supplement: 12864_2015_1592_MOESM2_ESM.pdf [file 12864_2015_1592_MOESM2_ESM.pdf]

**Additional File 2. LG/J, SM/J and LG/J x SM/J Polymorphic Indels Overview**

| Chr | total  | 2.5kb<br>downstream | 2.5kb<br>upstream | 3prime<br>UTR | 5prime<br>UTR | Intron | Regulatory<br>Features | Frameshift | Stop | Splice | Strain* |
|-----|--------|---------------------|-------------------|---------------|---------------|--------|------------------------|------------|------|--------|---------|
| 1   | 100594 | 5880                | 5313              | 1516          | 525           | 47774  | 1959                   | 16         | 2    | 1      | LG/J    |
|     | 97603  | 5677                | 5491              | 1524          | 530           | 46237  | 2032                   | 19         | 2    | 0      | SM/J    |
|     | 115599 | 5121                | 5046              | 1327          | 387           | 44405  | 2272                   | 23         | 0    | 1      | P       |
| 2   | 61777  | 5729                | 4749              | 1135          | 506           | 32069  | 1231                   | 14         | 1    | 0      | LG/J    |
|     | 84426  | 8589                | 7211              | 1655          | 890           | 46184  | 1788                   | 18         | 3    | 0      | SM/J    |
|     | 86718  | 7730                | 6602              | 1438          | 698           | 42149  | 1836                   | 18         | 2    | 0      | P       |
| 3   | 61635  | 3154                | 2718              | 755           | 298           | 22388  | 1019                   | 11         | 4    | 1      | LG/J    |
|     | 72985  | 3949                | 3612              | 869           | 428           | 27716  | 1423                   | 17         | 2    | 5      | SM/J    |
|     | 76029  | 3304                | 2979              | 783           | 297           | 25368  | 1416                   | 14         | 2    | 4      | P       |
| 4   | 75437  | 8730                | 8222              | 1779          | 786           | 44595  | 2599                   | 32         | 3    | 8      | LG/J    |
|     | 78219  | 8617                | 8251              | 1778          | 833           | 45213  | 2574                   | 22         | 9    | 0      | SM/J    |
|     | 82338  | 7347                | 6804              | 1347          | 596           | 39272  | 2420                   | 39         | 6    | 8      | P       |
| 5   | 62543  | 4624                | 4684              | 978           | 495           | 31339  | 1874                   | 5          | 0    | 2      | LG/J    |
|     | 57964  | 3932                | 3630              | 900           | 392           | 28940  | 1435                   | 13         | 0    | 3      | SM/J    |
|     | 60505  | 3982                | 3811              | 804           | 397           | 26602  | 1815                   | 12         | 0    | 1      | P       |
| 6   | 59329  | 3748                | 3684              | 877           | 315           | 29776  | 1308                   | 15         | 0    | 1      | LG/J    |
|     | 56313  | 3578                | 3414              | 806           | 387           | 29777  | 1294                   | 14         | 2    | 1      | SM/J    |
|     | 79445  | 4213                | 4173              | 907           | 395           | 34661  | 1829                   | 23         | 2    | 0      | P       |
| 7   | 55249  | 4903                | 4926              | 960           | 388           | 24838  | 1355                   | 47         | 2    | 0      | LG/J    |
|     | 73576  | 7086                | 6807              | 1240          | 580           | 36654  | 1810                   | 54         | 3    | 0      | SM/J    |
|     | 83581  | 6985                | 6748              | 1158          | 499           | 34145  | 2085                   | 57         | 2    | 0      | P       |
| 8   | 70390  | 4496                | 4492              | 1077          | 521           | 31152  | 1845                   | 14         | 2    | 4      | LG/J    |
|     | 69194  | 4723                | 4483              | 1128          | 499           | 30588  | 1822                   | 18         | 2    | 7      | SM/J    |
|     | 51456  | 2857                | 2900              | 590           | 204           | 22235  | 1473                   | 7          | 0    | 3      | P       |
| 9   | 69270  | 5190                | 4721              | 1034          | 466           | 36758  | 1672                   | 18         | 3    | 2      | LG/J    |
|     | 57676  | 4612                | 4202              | 939           | 394           | 32386  | 1528                   | 20         | 2    | 1      | SM/J    |
|     | 74602  | 4158                | 3877              | 919           | 344           | 32499  | 1778                   | 16         | 4    | 1      | P       |
| 10  | 55669  | 3217                | 3079              | 780           | 299           | 25797  | 1256                   | 13         | 1    | 1      | LG/J    |
|     | 46995  | 3233                | 2997              | 828           | 282           | 22810  | 1257                   | 7          | 0    | 0      | SM/J    |
|     | 69279  | 3607                | 3434              | 838           | 308           | 26692  | 1764                   | 15         | 1    | 1      | P       |
| 11  | 68457  | 7966                | 7673              | 1661          | 741           | 39667  | 2315                   | 43         | 0    | 1      | LG/J    |
|     | 56164  | 6327                | 6399              | 1359          | 586           | 30906  | 1968                   | 23         | 2    | 0      | SM/J    |
|     | 71359  | 7623                | 7360              | 1498          | 585           | 34539  | 2570                   | 36         | 2    | 1      | P       |

|        |         |       |       |       |      |        |       |     |    |    |      |
|--------|---------|-------|-------|-------|------|--------|-------|-----|----|----|------|
| 12     | 60501   | 3173  | 3028  | 569   | 229  | 22409  | 1232  | 7   | 0  | 0  | LG/J |
|        | 59728   | 3029  | 2885  | 537   | 189  | 21107  | 1170  | 8   | 9  | 1  | SM/J |
|        | 68945   | 2820  | 2876  | 485   | 191  | 20467  | 1336  | 10  | 9  | 1  | P    |
| 13     | 65598   | 3103  | 2782  | 727   | 255  | 27246  | 1213  | 6   | 0  | 0  | LG/J |
|        | 51833   | 2908  | 2751  | 711   | 266  | 23494  | 1232  | 10  | 1  | 0  | SM/J |
|        | 65268   | 2846  | 2630  | 689   | 220  | 21704  | 1436  | 6   | 1  | 0  | P    |
| 14     | 40916   | 2731  | 2688  | 468   | 238  | 17474  | 810   | 5   | 0  | 0  | LG/J |
|        | 60065   | 3103  | 3114  | 539   | 306  | 22052  | 1003  | 9   | 2  | 0  | SM/J |
|        | 45675   | 1848  | 1948  | 254   | 152  | 13032  | 754   | 6   | 2  | 0  | P    |
| 15     | 39254   | 2002  | 1857  | 485   | 163  | 15820  | 870   | 15  | 0  | 1  | LG/J |
|        | 38501   | 2038  | 1917  | 527   | 171  | 16370  | 915   | 10  | 0  | 3  | SM/J |
|        | 52395   | 2160  | 2071  | 509   | 159  | 18843  | 1129  | 15  | 0  | 4  | P    |
| 16     | 33445   | 1600  | 1344  | 320   | 151  | 12360  | 538   | 6   | 0  | 0  | LG/J |
|        | 37846   | 2262  | 2053  | 492   | 217  | 16328  | 806   | 6   | 0  | 0  | SM/J |
|        | 41128   | 2184  | 1898  | 477   | 202  | 16175  | 831   | 8   | 0  | 0  | P    |
| 17     | 45761   | 4686  | 4590  | 1019  | 449  | 23535  | 1430  | 15  | 0  | 1  | LG/J |
|        | 40884   | 3921  | 3808  | 786   | 444  | 21582  | 1324  | 12  | 0  | 1  | SM/J |
|        | 50108   | 4251  | 4162  | 838   | 417  | 21628  | 1723  | 21  | 0  | 2  | P    |
| 18     | 33362   | 1291  | 1239  | 331   | 139  | 14889  | 608   | 3   | 0  | 0  | LG/J |
|        | 38159   | 1648  | 1612  | 451   | 185  | 17346  | 855   | 2   | 0  | 0  | SM/J |
|        | 46100   | 1635  | 1650  | 421   | 159  | 17804  | 987   | 6   | 0  | 0  | P    |
| 19     | 34074   | 2016  | 1999  | 575   | 161  | 20401  | 945   | 3   | 0  | 1  | LG/J |
|        | 27450   | 1579  | 1612  | 475   | 141  | 16026  | 769   | 3   | 0  | 1  | SM/J |
|        | 30672   | 1267  | 1314  | 345   | 87   | 14404  | 788   | 4   | 1  | 0  | P    |
| X      | 33811   | 1872  | 1869  | 332   | 195  | 9253   | 222   | 4   | 0  | 1  | LG/J |
|        | 21877   | 1537  | 1528  | 280   | 146  | 8181   | 216   | 7   | 0  | 0  | SM/J |
|        | 36254   | 1816  | 1747  | 298   | 165  | 9698   | 276   | 5   | 1  | 0  | P    |
| genome | 1127072 | 80111 | 75657 | 17378 | 7320 | 529540 | 26301 | 292 | 18 | 25 | LG/J |
|        | 1127458 | 82348 | 77777 | 17824 | 7866 | 539897 | 27221 | 292 | 39 | 23 | SM/J |
|        | 1287456 | 77754 | 74030 | 15925 | 6462 | 516322 | 30518 | 341 | 35 | 27 | P    |

\* LG/J = Indel in LG/J relative to reference genome; SM/J = Indel in SM/J relative to reference genome; P = Indel that are polymorphic between the LG/J and SM/J strains.
