# Supplementary material for: Using whole-genome sequences of the LG/J and SM/J inbred mouse strains to prioritize quantitative trait genes and nucleotides
Source: PubMed Central journal article supplement (PMC4445795; doi:10.1186/s12864-015-1592-3), 2015-05-28
Supplement: 12864_2015_1592_MOESM8_ESM.pdf [file 12864_2015_1592_MOESM8_ESM.pdf]

**Additional File 8: Distances Between the LG/J and SM/J Strains and Other Sequenced Mouse Strains**

| Chr | 129P2 | 129S1 | 129S5 | A/J  | AKR/<br>J | BALBc/<br>J | C3HHe/<br>J | C57BL/<br>6NJ | CAST/<br>EiJ | CBA/<br>J | DBA2/<br>J | FVBN/<br>J | LP/J | NODShiLt<br>/J | NZOHiLt/<br>J | PWKPh/<br>J | SPRETEi/<br>J | WSBEi/<br>J | SM/<br>J | LG/J | Strain |
|-----|-------|-------|-------|------|-----------|-------------|-------------|---------------|--------------|-----------|------------|------------|------|----------------|---------------|-------------|---------------|-------------|----------|------|--------|
| 1   | 0.91  | 0.91  | 0.91  | 0.92 | 0.91      | 0.90        | 0.93        | 0.92          | 0.67         | 0.92      | 0.89       | 0.91       | 0.90 | 0.92           | 0.90          | 0.69        | 0.34          | 0.88        | 0.92     | 1.00 | LG/J   |
|     | 0.91  | 0.91  | 0.91  | 0.92 | 0.90      | 0.90        | 0.91        | 0.92          | 0.67         | 0.91      | 0.89       | 0.92       | 0.91 | 0.92           | 0.91          | 0.69        | 0.34          | 0.88        | 1.00     | 0.92 | SM/J   |
| 2   | 0.92  | 0.92  | 0.92  | 0.94 | 0.93      | 0.92        | 0.92        | 0.94          | 0.70         | 0.93      | 0.91       | 0.92       | 0.91 | 0.91           | 0.91          | 0.66        | 0.34          | 0.88        | 0.93     | 1.00 | LG/J   |
|     | 0.92  | 0.92  | 0.91  | 0.93 | 0.92      | 0.93        | 0.91        | 0.92          | 0.69         | 0.93      | 0.91       | 0.92       | 0.92 | 0.91           | 0.91          | 0.66        | 0.34          | 0.89        | 1.00     | 0.93 | SM/J   |
| 3   | 0.92  | 0.92  | 0.92  | 0.92 | 0.96      | 0.94        | 0.92        | 0.94          | 0.67         | 0.92      | 0.94       | 0.93       | 0.92 | 0.94           | 0.93          | 0.67        | 0.34          | 0.90        | 0.93     | 1.00 | LG/J   |
|     | 0.92  | 0.92  | 0.92  | 0.92 | 0.92      | 0.93        | 0.93        | 0.92          | 0.68         | 0.92      | 0.92       | 0.91       | 0.92 | 0.91           | 0.91          | 0.68        | 0.34          | 0.89        | 1.00     | 0.93 | SM/J   |
| 4   | 0.89  | 0.89  | 0.89  | 0.91 | 0.94      | 0.92        | 0.94        | 0.92          | 0.66         | 0.93      | 0.92       | 0.92       | 0.88 | 0.92           | 0.91          | 0.67        | 0.34          | 0.88        | 0.93     | 1.00 | LG/J   |
|     | 0.88  | 0.88  | 0.88  | 0.90 | 0.91      | 0.90        | 0.92        | 0.92          | 0.66         | 0.92      | 0.92       | 0.91       | 0.87 | 0.90           | 0.90          | 0.67        | 0.35          | 0.88        | 1.00     | 0.93 | SM/J   |
| 5   | 0.93  | 0.93  | 0.92  | 0.96 | 0.96      | 0.95        | 0.94        | 0.94          | 0.67         | 0.95      | 0.94       | 0.95       | 0.93 | 0.93           | 0.92          | 0.65        | 0.35          | 0.90        | 0.96     | 1.00 | LG/J   |
|     | 0.92  | 0.92  | 0.92  | 0.95 | 0.95      | 0.94        | 0.94        | 0.95          | 0.67         | 0.94      | 0.93       | 0.94       | 0.92 | 0.92           | 0.92          | 0.65        | 0.35          | 0.89        | 1.00     | 0.96 | SM/J   |
| 6   | 0.91  | 0.91  | 0.91  | 0.95 | 0.94      | 0.94        | 0.94        | 0.94          | 0.66         | 0.93      | 0.95       | 0.90       | 0.91 | 0.90           | 0.90          | 0.67        | 0.35          | 0.86        | 0.92     | 1.00 | LG/J   |
|     | 0.91  | 0.91  | 0.91  | 0.91 | 0.88      | 0.91        | 0.92        | 0.94          | 0.65         | 0.92      | 0.91       | 0.92       | 0.91 | 0.89           | 0.87          | 0.66        | 0.35          | 0.87        | 1.00     | 0.92 | SM/J   |
| 7   | 0.85  | 0.91  | 0.91  | 0.95 | 0.95      | 0.94        | 0.91        | 0.94          | 0.65         | 0.91      | 0.87       | 0.93       | 0.90 | 0.91           | 0.90          | 0.67        | 0.36          | 0.89        | 0.90     | 1.00 | LG/J   |
|     | 0.81  | 0.86  | 0.86  | 0.89 | 0.89      | 0.89        | 0.87        | 0.90          | 0.66         | 0.87      | 0.86       | 0.89       | 0.86 | 0.87           | 0.88          | 0.69        | 0.36          | 0.86        | 1.00     | 0.90 | SM/J   |
| 8   | 0.92  | 0.92  | 0.92  | 0.92 | 0.94      | 0.94        | 0.92        | 0.90          | 0.66         | 0.95      | 0.94       | 0.94       | 0.92 | 0.94           | 0.90          | 0.66        | 0.35          | 0.89        | 0.95     | 1.00 | LG/J   |
|     | 0.91  | 0.91  | 0.91  | 0.92 | 0.93      | 0.93        | 0.92        | 0.90          | 0.66         | 0.95      | 0.94       | 0.94       | 0.93 | 0.93           | 0.91          | 0.67        | 0.35          | 0.88        | 1.00     | 0.95 | SM/J   |
| 9   | 0.89  | 0.89  | 0.89  | 0.92 | 0.90      | 0.92        | 0.92        | 0.90          | 0.68         | 0.89      | 0.90       | 0.90       | 0.89 | 0.92           | 0.92          | 0.68        | 0.35          | 0.87        | 0.91     | 1.00 | LG/J   |
|     | 0.92  | 0.92  | 0.92  | 0.93 | 0.91      | 0.93        | 0.94        | 0.93          | 0.68         | 0.90      | 0.92       | 0.92       | 0.91 | 0.93           | 0.90          | 0.66        | 0.35          | 0.90        | 1.00     | 0.91 | SM/J   |
| 10  | 0.94  | 0.94  | 0.94  | 0.95 | 0.94      | 0.95        | 0.94        | 0.94          | 0.65         | 0.93      | 0.93       | 0.92       | 0.94 | 0.93           | 0.93          | 0.65        | 0.34          | 0.88        | 0.93     | 1.00 | LG/J   |
|     | 0.93  | 0.94  | 0.94  | 0.94 | 0.94      | 0.93        | 0.95        | 0.94          | 0.65         | 0.95      | 0.93       | 0.93       | 0.94 | 0.93           | 0.93          | 0.66        | 0.34          | 0.88        | 1.00     | 0.93 | SM/J   |
| 11  | 0.91  | 0.91  | 0.91  | 0.90 | 0.93      | 0.92        | 0.90        | 0.91          | 0.66         | 0.91      | 0.89       | 0.92       | 0.92 | 0.91           | 0.88          | 0.67        | 0.35          | 0.90        | 0.93     | 1.00 | LG/J   |
|     | 0.93  | 0.93  | 0.93  | 0.90 | 0.91      | 0.93        | 0.90        | 0.93          | 0.66         | 0.93      | 0.91       | 0.93       | 0.92 | 0.92           | 0.88          | 0.66        | 0.35          | 0.90        | 1.00     | 0.93 | SM/J   |
| 12  | 0.90  | 0.90  | 0.90  | 0.91 | 0.92      | 0.90        | 0.92        | 0.91          | 0.66         | 0.91      | 0.90       | 0.89       | 0.90 | 0.91           | 0.91          | 0.66        | 0.36          | 0.87        | 0.92     | 1.00 | LG/J   |
|     | 0.90  | 0.90  | 0.90  | 0.90 | 0.90      | 0.91        | 0.91        | 0.91          | 0.66         | 0.90      | 0.90       | 0.90       | 0.90 | 0.90           | 0.91          | 0.66        | 0.36          | 0.88        | 1.00     | 0.92 | SM/J   |
| 13  | 0.90  | 0.90  | 0.90  | 0.89 | 0.91      | 0.91        | 0.92        | 0.90          | 0.66         | 0.91      | 0.92       | 0.91       | 0.92 | 0.90           | 0.89          | 0.70        | 0.34          | 0.87        | 0.92     | 1.00 | LG/J   |
|     | 0.92  | 0.93  | 0.92  | 0.90 | 0.90      | 0.93        | 0.94        | 0.93          | 0.65         | 0.95      | 0.95       | 0.92       | 0.91 | 0.91           | 0.88          | 0.68        | 0.35          | 0.89        | 1.00     | 0.92 | SM/J   |
| 14  | 0.87  | 0.87  | 0.86  | 0.94 | 0.94      | 0.94        | 0.91        | 0.94          | 0.66         | 0.92      | 0.89       | 0.91       | 0.81 | 0.88           | 0.88          | 0.78        | 0.34          | 0.88        | 0.94     | 1.00 | LG/J   |
|     | 0.84  | 0.84  | 0.84  | 0.93 | 0.94      | 0.93        | 0.91        | 0.90          | 0.66         | 0.92      | 0.89       | 0.92       | 0.80 | 0.91           | 0.87          | 0.75        | 0.34          | 0.88        | 1.00     | 0.94 | SM/J   |
| 15  | 0.88  | 0.88  | 0.88  | 0.93 | 0.94      | 0.94        | 0.93        | 0.94          | 0.68         | 0.92      | 0.93       | 0.94       | 0.89 | 0.92           | 0.92          | 0.68        | 0.34          | 0.90        | 0.93     | 1.00 | LG/J   |
|     | 0.88  | 0.88  | 0.87  | 0.93 | 0.94      | 0.93        | 0.93        | 0.95          | 0.68         | 0.93      | 0.94       | 0.94       | 0.88 | 0.93           | 0.93          | 0.68        | 0.34          | 0.89        | 1.00     | 0.93 | SM/J   |
| 16  | 0.95  | 0.95  | 0.94  | 0.96 | 0.96      | 0.97        | 0.94        | 0.95          | 0.67         | 0.92      | 0.95       | 0.96       | 0.95 | 0.95           | 0.95          | 0.65        | 0.34          | 0.90        | 0.95     | 1.00 | LG/J   |
|     | 0.92  | 0.92  | 0.92  | 0.93 | 0.94      | 0.94        | 0.92        | 0.94          | 0.68         | 0.92      | 0.94       | 0.92       | 0.93 | 0.93           | 0.93          | 0.66        | 0.34          | 0.90        | 1.00     | 0.95 | SM/J   |
| 17  | 0.91  | 0.91  | 0.90  | 0.93 | 0.92      | 0.94        | 0.91        | 0.93          | 0.68         | 0.91      | 0.92       | 0.91       | 0.92 | 0.89           | 0.92          | 0.66        | 0.34          | 0.88        | 0.93     | 1.00 | LG/J   |
|     | 0.89  | 0.89  | 0.89  | 0.92 | 0.92      | 0.92        | 0.94        | 0.93          | 0.68         | 0.93      | 0.92       | 0.91       | 0.90 | 0.89           | 0.90          | 0.67        | 0.34          | 0.87        | 1.00     | 0.93 | SM/J   |
| 18  | 0.91  | 0.91  | 0.91  | 0.95 | 0.94      | 0.94        | 0.95        | 0.95          | 0.65         | 0.93      | 0.95       | 0.94       | 0.91 | 0.94           | 0.92          | 0.65        | 0.35          | 0.91        | 0.93     | 1.00 | LG/J   |
|     | 0.90  | 0.90  | 0.89  | 0.93 | 0.92      | 0.92        | 0.93        | 0.94          | 0.65         | 0.93      | 0.93       | 0.93       | 0.90 | 0.92           | 0.91          | 0.65        | 0.35          | 0.90        | 1.00     | 0.93 | SM/J   |
| 19  | 0.92  | 0.92  | 0.92  | 0.92 | 0.93      | 0.91        | 0.92        | 0.91          | 0.67         | 0.91      | 0.90       | 0.91       | 0.92 | 0.93           | 0.93          | 0.66        | 0.35          | 0.89        | 0.93     | 1.00 | LG/J   |
|     | 0.93  | 0.93  | 0.93  | 0.92 | 0.93      | 0.92        | 0.92        | 0.93          | 0.67         | 0.91      | 0.90       | 0.91       | 0.93 | 0.93           | 0.90          | 0.65        | 0.35          | 0.89        | 1.00     | 0.93 | SM/J   |
| X   | 0.95  | 0.95  | 0.95  | 0.98 | 0.96      | 0.98        | 0.98        | 0.96          | 0.73         | 0.98      | 0.96       | 0.96       | 0.95 | 0.95           | 0.94          | 0.70        | 0.27          | 0.92        | 0.96     | 1.00 | LG/J   |
|     | 0.98  | 0.98  | 0.98  | 0.95 | 0.99      | 0.94        | 0.95        | 0.98          | 0.76         | 0.95      | 0.99       | 0.98       | 0.98 | 0.98           | 0.97          | 0.68        | 0.27          | 0.95        | 1.00     | 0.96 | SM/J   |
| G*  | 0.91  | 0.91  | 0.91  | 0.93 | 0.94      | 0.93        | 0.93        | 0.93          | 0.67         | 0.92      | 0.92       | 0.92       | 0.91 | 0.92           | 0.91          | 0.67        | 0.34          | 0.89        | 0.93     | 1.00 | LG/J   |
|     | 0.91  | 0.91  | 0.91  | 0.92 | 0.92      | 0.92        | 0.92        | 0.93          | 0.67         | 0.93      | 0.92       | 0.92       | 0.91 | 0.92           | 0.91          | 0.67        | 0.34          | 0.89        | 1.00     | 0.93 | SM/J   |

---

\*G = Genome
