# Supplementary material for: Using whole-genome sequences of the LG/J and SM/J inbred mouse strains to prioritize quantitative trait genes and nucleotides
Source: PubMed Central journal article supplement (PMC4445795; doi:10.1186/s12864-015-1592-3), 2015-05-28
Supplement: 12864_2015_1592_MOESM9_ESM.pdf [file 12864_2015_1592_MOESM9_ESM.pdf]

## Cluster Dendrogram

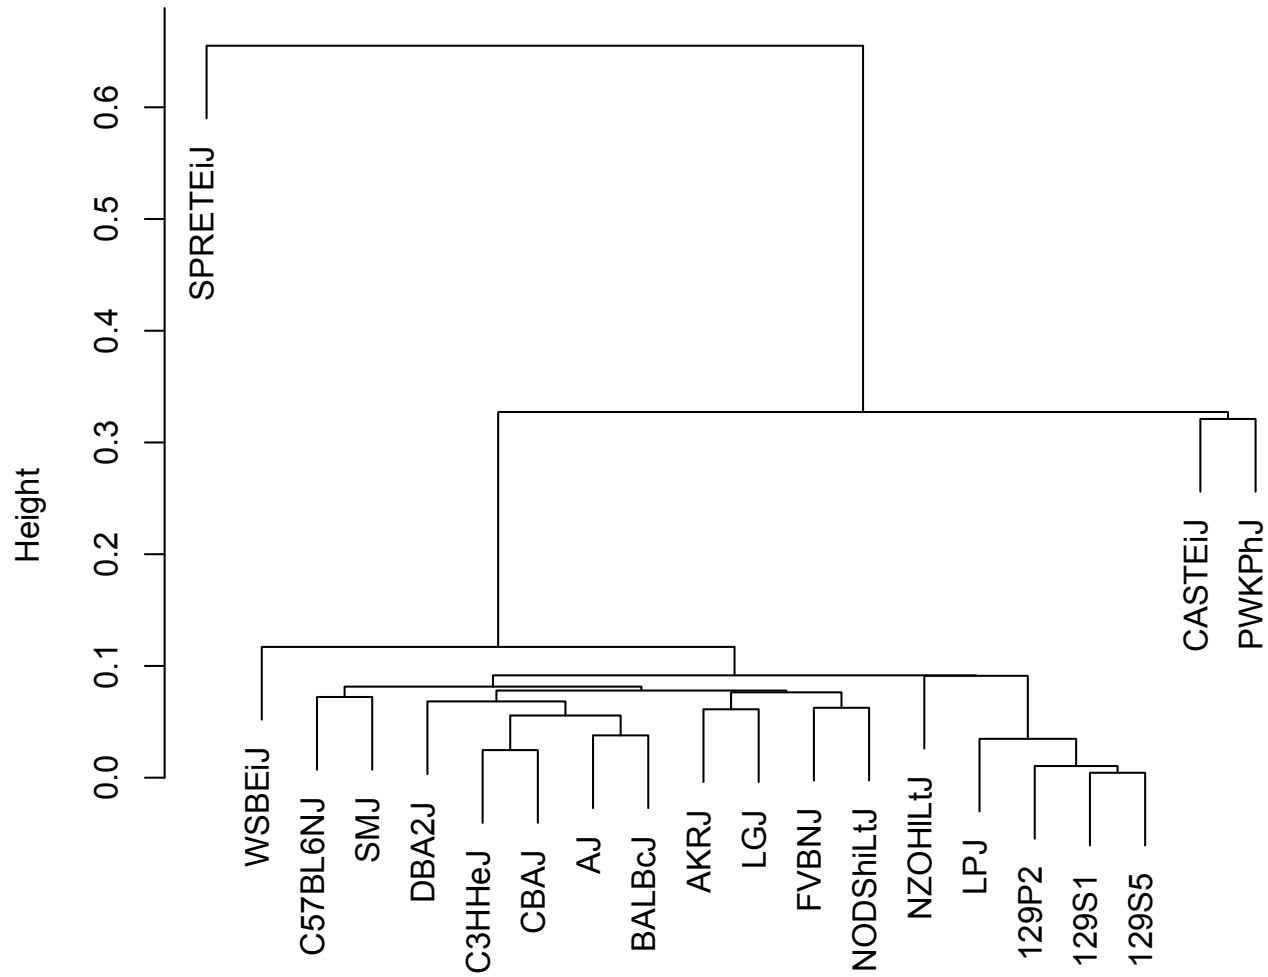

Additional File 9: Phylogenetic Tree of 20 Sequenced Mouse Strains
