# Supplementary material for: Using whole-genome sequences of the LG/J and SM/J inbred mouse strains to prioritize quantitative trait genes and nucleotides
Source: PubMed Central journal article supplement (PMC4445795; doi:10.1186/s12864-015-1592-3), 2015-05-28
Supplement: 12864_2015_1592_MOESM15_ESM.pdf [file 12864_2015_1592_MOESM15_ESM.pdf]

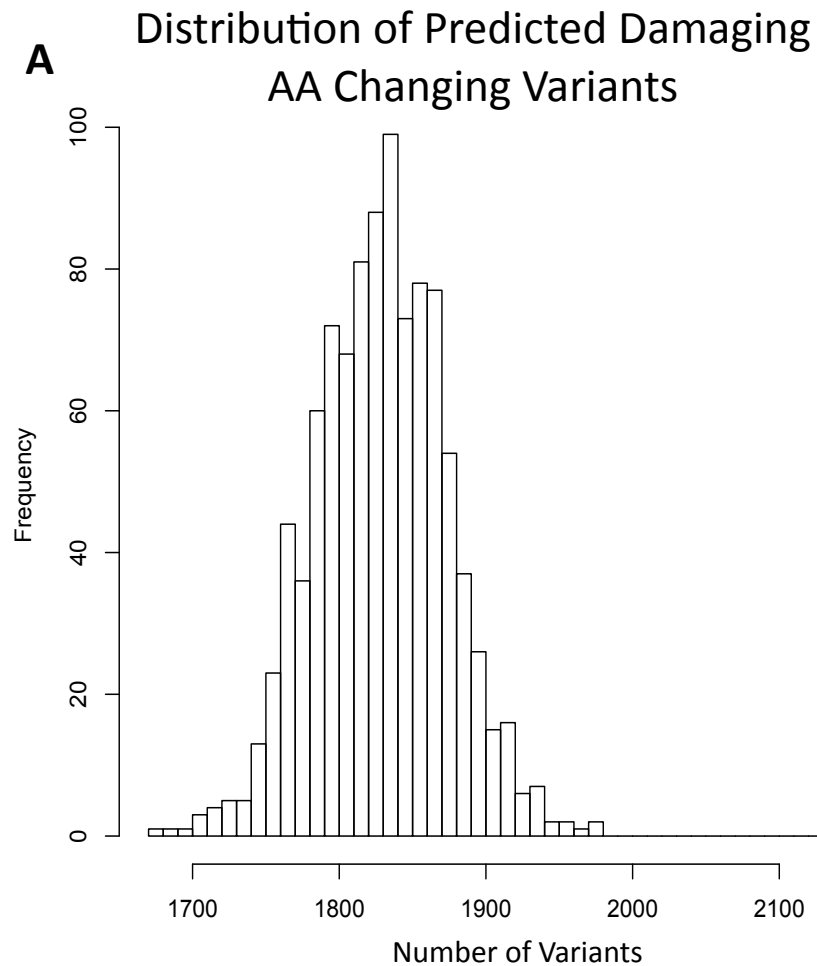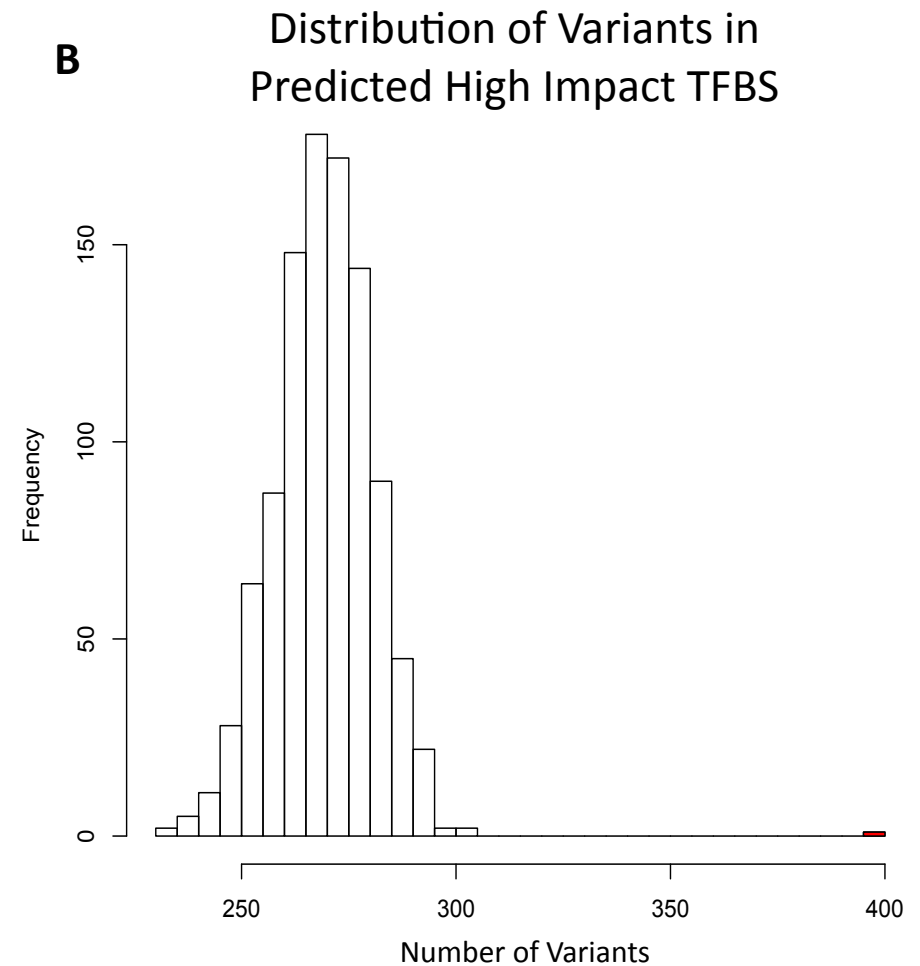

Additional File 15: Distribution of the number of variants predicted to have functional consequences in QTL intervals (indicated by the red bar) and in 1000 sets of randomly selected non-QTL regions of similar size. **A.** The distribution of amino-acid changing mutations predicted to be damaging by at least one algorithm (LRT, PolyPhen, SIFT);  $p < 2.2e^{-16}$ . **B.** The distributions of variants falling in transcription factor binding site motifs that are predicted to have a high impact (predictions generated by MOODS software);  $p < 2.2e^{-16}$ .
